# Supplementary material
Source: HighWire-hosted journal article supplement (http://www.cfp.ca/highwire/filestream/30336/field_highwire_adjunct_files/0/AQHI_Figs1-3.pdf)
Supplement: AQHI_Figs1-3.pdf [file AQHI_Figs1-3.pdf]

Figure 1. Screen capture from the Environment Canada website of an Air Quality Health Index forecast for June 28, 2011

## Air Quality Health Index

### Toronto

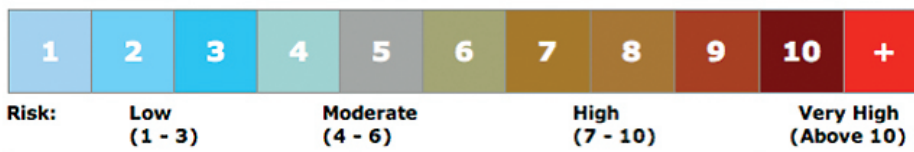

#### Current

Observed at  
10:00 AM EDT Tuesday 28  
June 2011

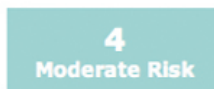

#### At-Risk Population:

- Consider reducing or rescheduling strenuous activities outdoors if you are experiencing symptoms.
- [Find out if you are at risk](#)

#### General Population:

- No need to modify your usual outdoor activities unless you experience symptoms such as coughing and throat irritation.

#### Forecast Maximums

Issued at 6:00 AM EDT Tuesday 28 June 2011

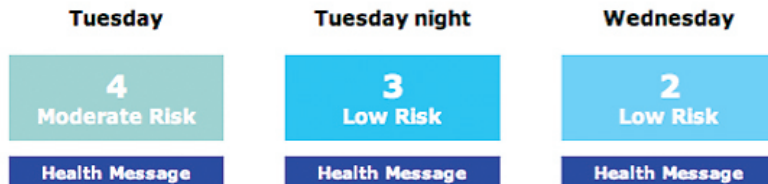

**Figure 2. Air Quality Health Index health messages.**

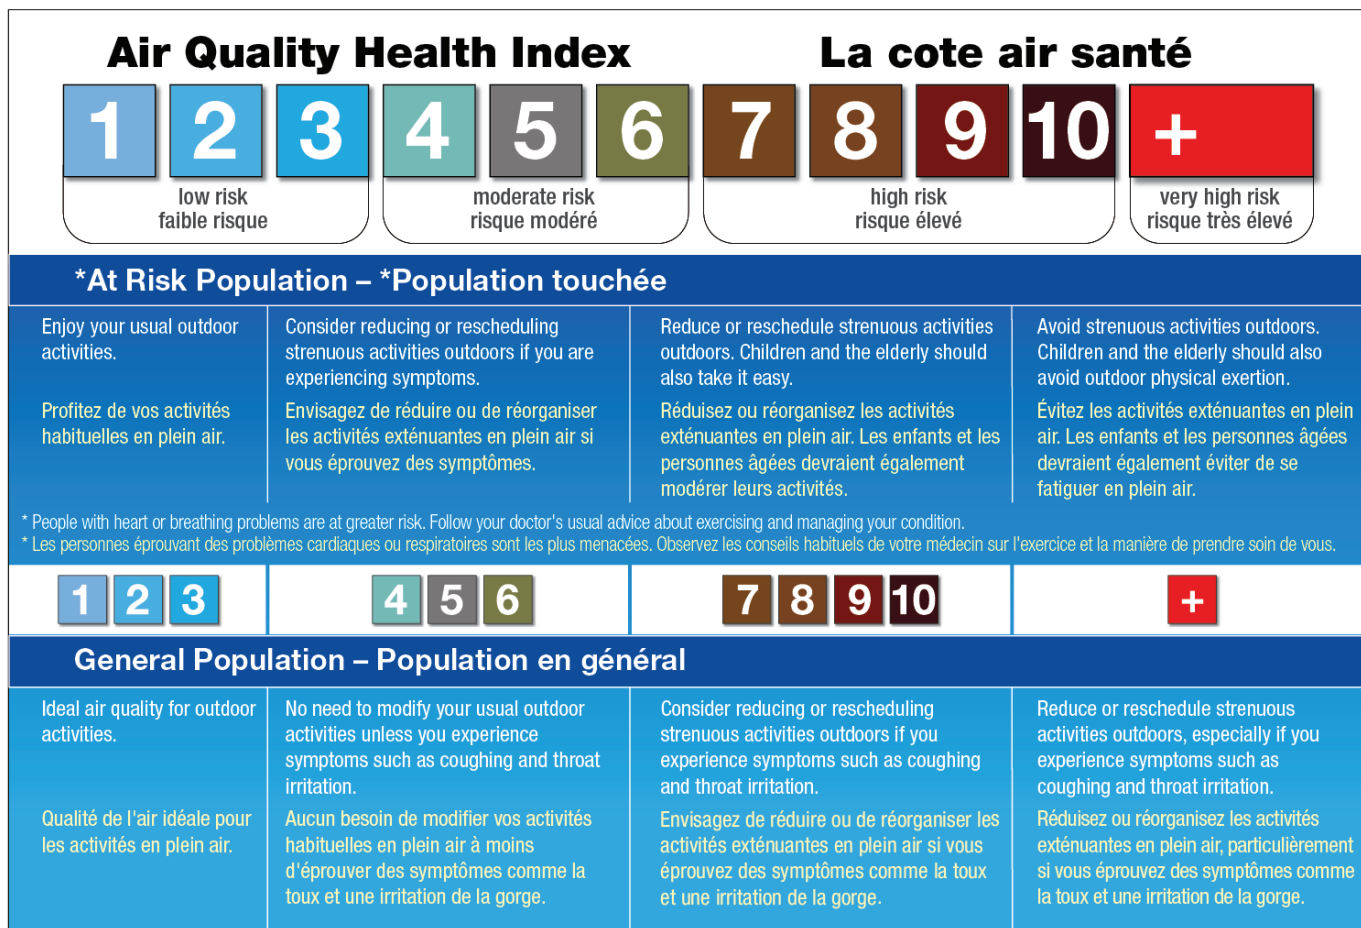

This figure is reprinted from an official work published by the Government of Canada; this reprint has not been produced in affiliation with or with the endorsement of the Government of Canada.

Figure 3. Air Quality Health Index tear sheet

This figure is reprinted from an official work published by the Government of Canada; this reprint has not been produced in affiliation with or with the endorsement of the Government of Canada.

be

air

aware

The new Air Quality Health Index relates air quality to your health on a simple scale from 1 to 10.

L'AIR

en

TÊTE

La cote air santé vous aide à comprendre les effets de la qualité de l'air sur votre santé en utilisant une simple échelle de 1 à 10.

Air Quality Health Index

12345678910+

La cote air santé

12345678910+

The **Air Quality Health Index** is designed to help you understand what air quality means for your health and make decisions to protect yourself by limiting exposure to air pollution by adjusting your outdoor activities when air pollution levels are high.

La **cote air santé** est facile à utiliser. Elle fait le lien entre la qualité de l'air et les risques pour la santé. Plus le nombre est bas, plus la qualité de l'air est bonne. Plus le nombre est élevé, plus les risques pour la santé sont élevés. Si vous prévoyez une activité à l'extérieur, vérifiez d'abord la cote air santé. Car lorsqu'on sait ce qu'elle représente pour nous, on respire mieux.

airhealth.ca



123



456

coteairsante.ca



78910+

Government of Canada  
Gouvernement du Canada

Canada
